# Supplementary material for: Design, synthesis, crystallization and biological evaluation of new symmetrical biscationic compounds as selective inhibitors of human Choline Kinase α1 (ChoKα1)
Source: PubMed Central journal article supplement (PMC4814829; doi:10.1038/srep23793), 2016-03-31
Supplement: srep23793-s1.pdf [file srep23793-s1.pdf]

## Supplementary information

### Design, synthesis, crystallization and biological evaluation of new symmetrical biscationic compounds as selective inhibitors of human Choline Kinase $\alpha 1$ (ChoK $\alpha 1$ )

Santiago Schiaffino-Ortega,<sup>1‡</sup> Eleonora Baglioni,<sup>1‡</sup>, Elena Mariotto,<sup>3</sup> Roberta Bortolozzi,<sup>3</sup> Lucía Serrán-Aguilera,<sup>1,4</sup> Pablo Ríos-Marco,<sup>2</sup> Maria Paz Carrasco-Jimenez,<sup>2</sup>, Miguel A. Gallo,<sup>1</sup> Ramon Hurtado-Guerrero,<sup>4</sup> Carmen Marco,<sup>2</sup> Giuseppe Basso,<sup>3</sup> Giampietro Viola,<sup>3\*</sup> Antonio Entrena<sup>1\*</sup>, Luisa Carlota López-Cara,<sup>1\*</sup>

<sup>1</sup>Departamento de Química Farmacéutica y Orgánica, Facultad de Farmacia, Campus de Cartuja, 18071 Granada (Spain). <sup>2</sup>Departamento de Bioquímica y Biología Molecular I, Facultad de Ciencias, Campus Fuentenueva, 18071 Granada (Spain). <sup>3</sup>Dipartimento di Salute della Donna e del Bambino, Laboratorio di Oncoematologia, Università di Padova, Padova, Italy. <sup>4</sup>Institute of Biocomputation and Physics of Complex Systems (BIFI), University of Zaragoza, BIFI-IQFR (CSIC) Joint Unit, Mariano Esquillor s/n, Campus Rio Ebro, Edificio I+D; Fundacion ARAID, Edificio Pignatelli 36 (Spain)

To whom correspondence should be addressed: \*Email: [lcarlotalopez@ugr.es](mailto:lcarlotalopez@ugr.es). Phone: (+)34-958-243849. Fax: (+)34-958-243850. \*Email: [aentrena@ugr.es](mailto:aentrena@ugr.es). Phone: (+)34-958-243848, Fax: (+)34-958-243850. \*Email: [giampietro.viola.1@unipd.it](mailto:giampietro.viola.1@unipd.it). Phone: (+)39 (0) 49 8211451. Fax: +39 (0) 49 8211462

## CONTENTS

- a) **Table S1.** Experimental conditions under microwaves.
- b) **Figure S1.** Detail view of compounds **2** and **4** inserted into of Cho binding site.
- c) **Figure S2.** Resulting poses of compounds **10b**, **10d**, and **10e** in the ChoK $\alpha 1/2$ .
- d) **Figure S3.** Resulting poses of compounds **10c**, **10f-k-d** in the of ChoK $\alpha 1/4$
- e) **Figure S4.** Quenching of intrinsic ChoK $\alpha 1$  tryptophan fluorescence.
- f) **Figure S5.** Jurkat cells treated with the indicated concentration of **10a** for 72h and then incubated for further 72 h in the absence of compound.
- g) **Figure S6.** Comparison of the docking pose of compound **10a** with the one of the crystal structure.
- h) **Table S2.** Data collection and refinement statistics.
- i) Experimental Procedures
- j) References

**Table S1:** Conditions reaction to obtain compound **7** and **8**

| Synthesis of <b>7</b> |                    |                      |        |
|-----------------------|--------------------|----------------------|--------|
|                       | Quantity           | Time and Temperature | Yields |
| Refluxed              | 5 g of <b>6</b>    | 8 h - 70 °C          | 21%    |
| MW                    | 1 g of <b>6</b>    | 28' - 130 °C         | 20%    |
|                       |                    | 14' - 140 °C         | 31%    |
|                       |                    | 28' - 140 °C         | 35%    |
|                       |                    | 56' - 140 °C         | 27%    |
|                       |                    | 14' - 150 °C         | 25%    |
| Synthesis of <b>8</b> |                    |                      |        |
| Refluxed              | 1 g of <b>7</b>    | 5 h - 70 °C          | 39%    |
| MW                    | 100 mg of <b>7</b> | 21' - 120 °C         | 65%    |
|                       | 200 mg of <b>7</b> | 21' - 120 °C         | 52%    |
|                       | 300 mg of <b>7</b> | 21' - 120 °C         | 55%    |
|                       |                    | 40' - 120 °C         | 50%    |

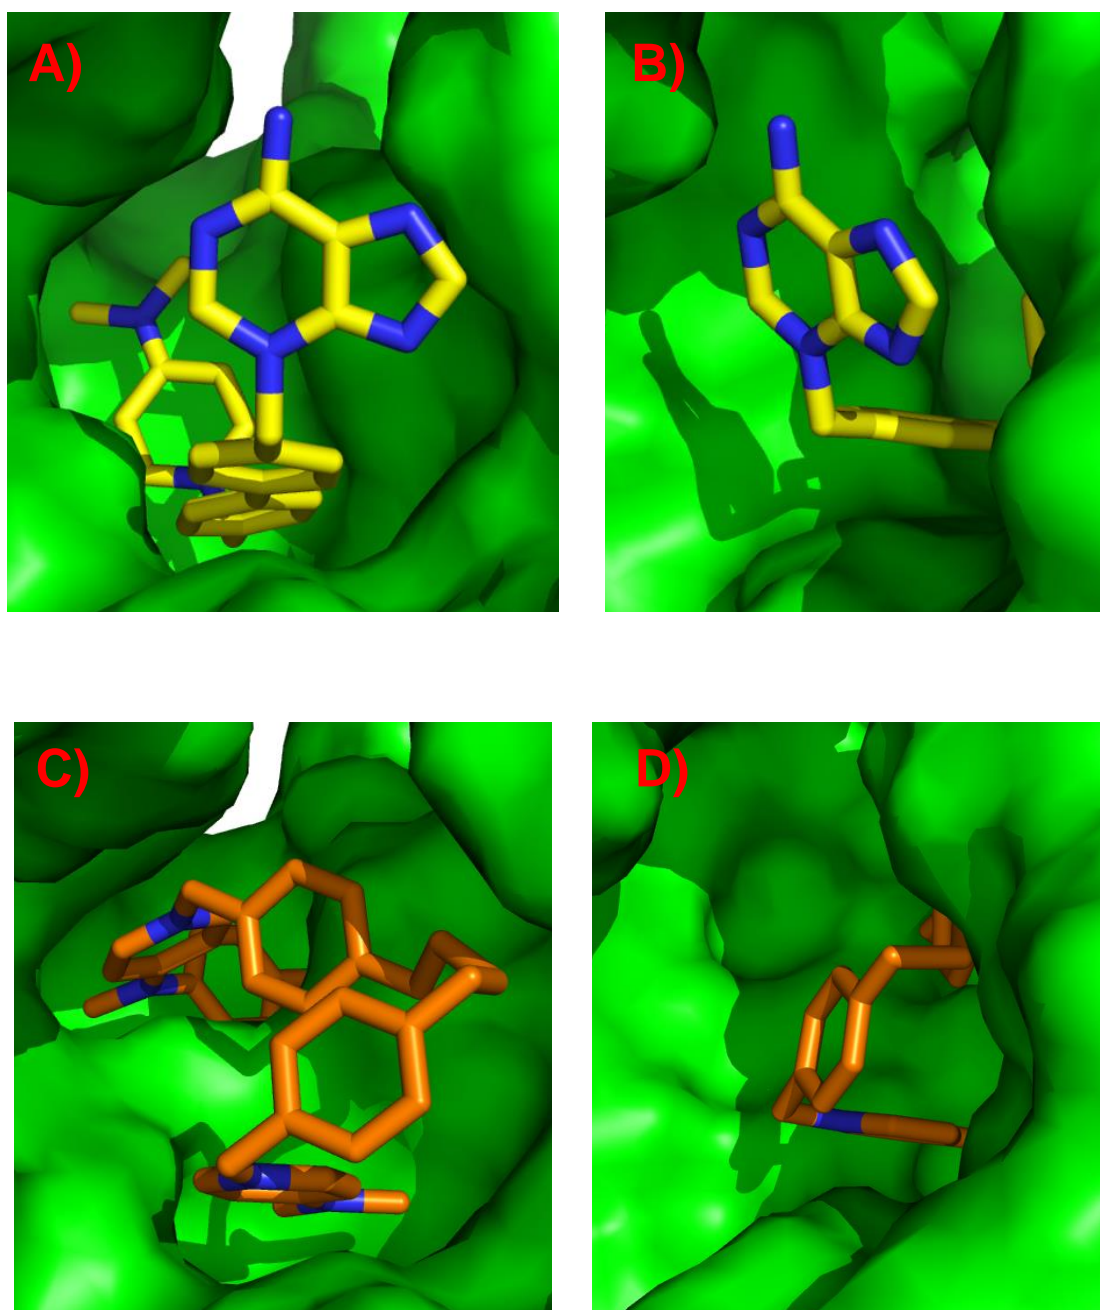

**Figure S1.** Detail view of the compounds **2** (carbon atoms in yellow color) and **4** (carbon atoms in cyan color) inserted into the Cho binding site represented by the protein surface. **(A)** The 1-(biphenyl-4-ylmethyl)-4-(dimethylamino)pyridinium fragment of compound **2** is inserted into the Cho binding site. **(B)** The adenine moiety is situated outside of the Cho binding site, and this fact justified the absence of interactions between the adenine moiety and the protein. **(C)** The 4-chloro-*N*-methylaniline fragment is inserted into the additional binding site, and the rest of the molecule is inserted into the ChoK binding site. **(D)** The second cationic head is also situated inside the protein.

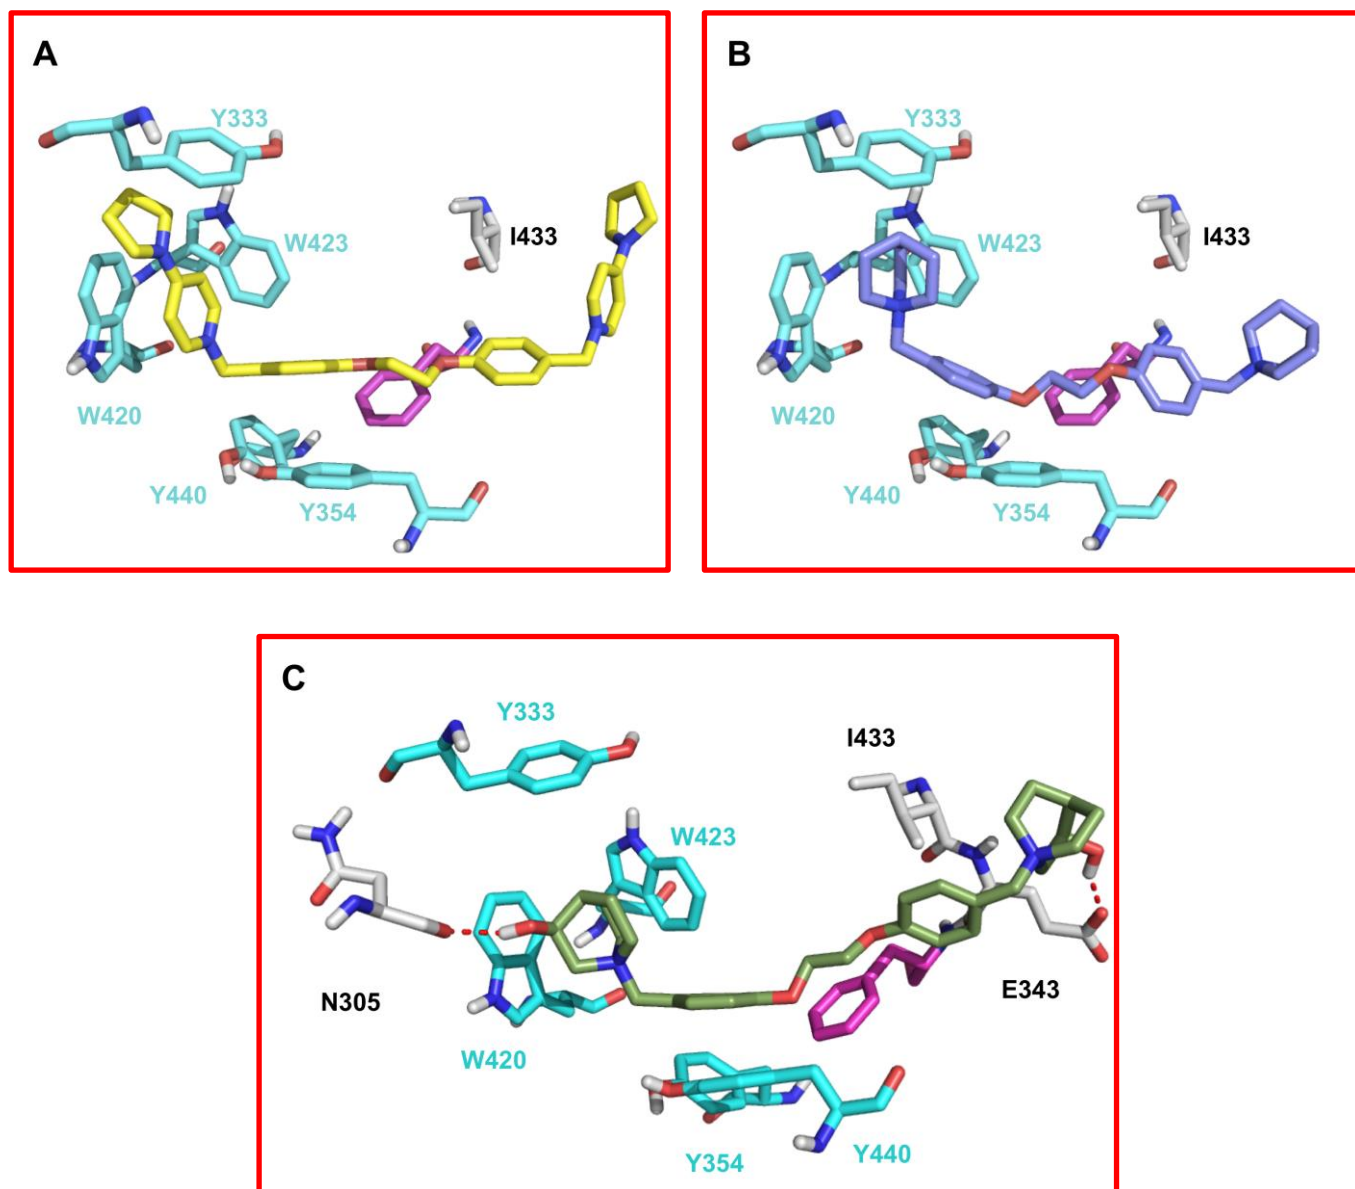

**Figure S2.** Poses resulting in the docking studies of compounds **10b** (A, carbon atoms in yellow color), **10d** (B, carbon atoms in purple color) and **10e** (C, carbon atoms in green color) inside the Cho binding site of ChoK $\alpha$ 1/2 complex (PDB ID: 4BR3)

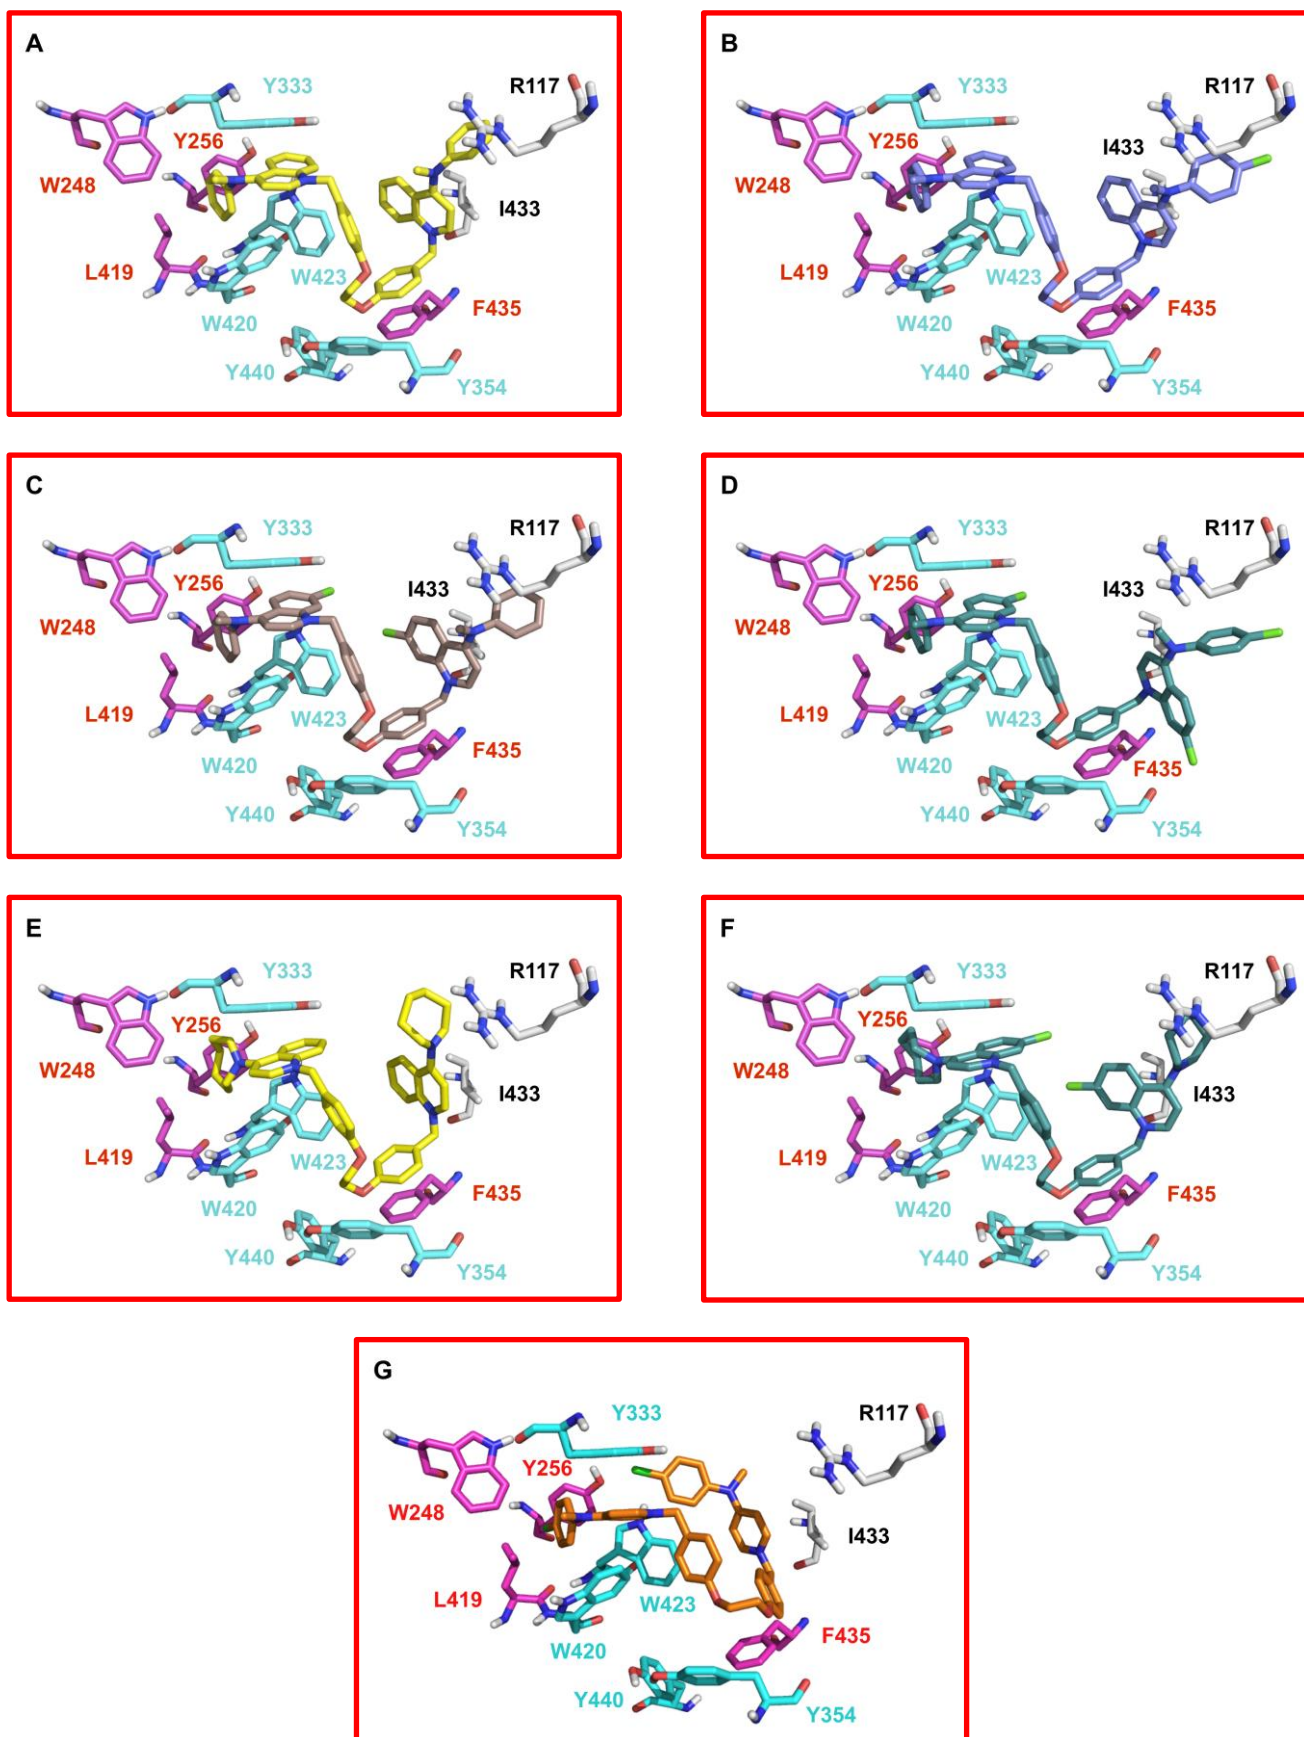

**Figure S3.** Poses resulting in the docking studies of compounds **10f** (A, carbon atoms in yellow color), **10g** (B, carbon atoms in blue-slate color), **10h** (C, carbon atoms in reddish-salmon color), **10i** (D, carbon atoms in blue color), **10j** (E, carbon atoms in yellow color), **10k** (F, carbon atoms in blue color) and **10c** (carbon atoms in orange color) inside the Cho binding site of ChoKa1/4 complex (PDB ID: 4CG8).

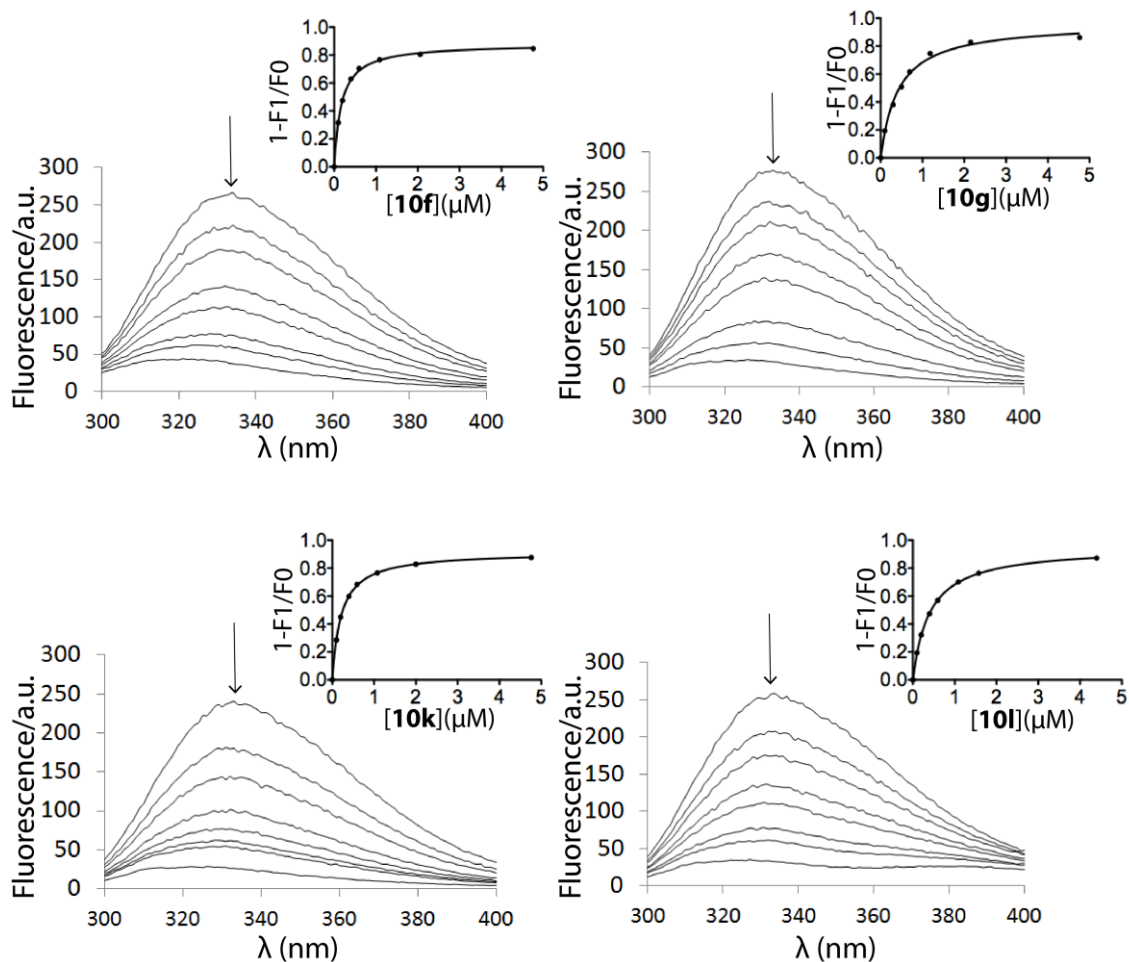

**Figure S4:** Quenching of intrinsic ChoK $\alpha$ 1 tryptophan fluorescence measured at increasing concentrations of compounds **10f**, **10g**, **10k** and **10l**. All data points represent the means  $\pm$  S.D. for three measurements. The  $K_d$  for the four compounds was determined by fitting fluorescence intensity data against its concentration. A black arrow indicates the decrease of the maximal fluorescence signal with increasing concentrations of each compound.

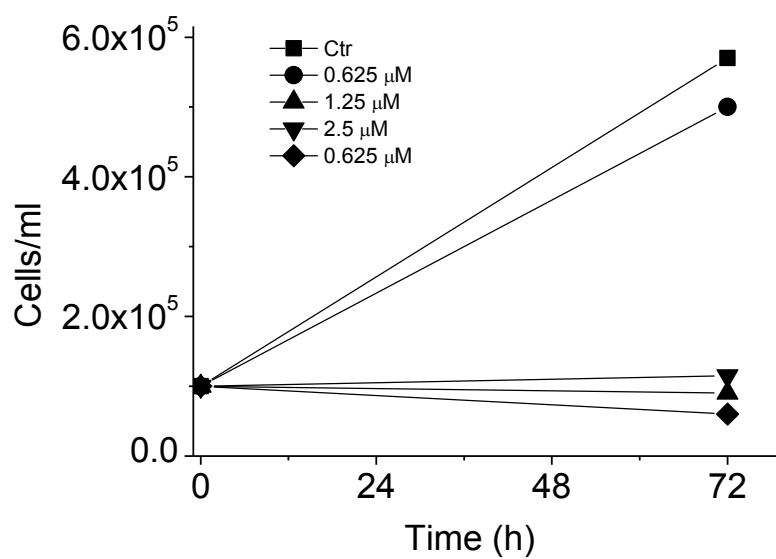

**Figure S5**

Jurkat cells were treated with the indicated concentration of **10a** for 72 h and then cells were harvested, washed, counted, and incubated in a drug-free medium. After a further 72 h of incubation, cell viability was analyzed by trypan blue exclusion assay as described in the experimental section.

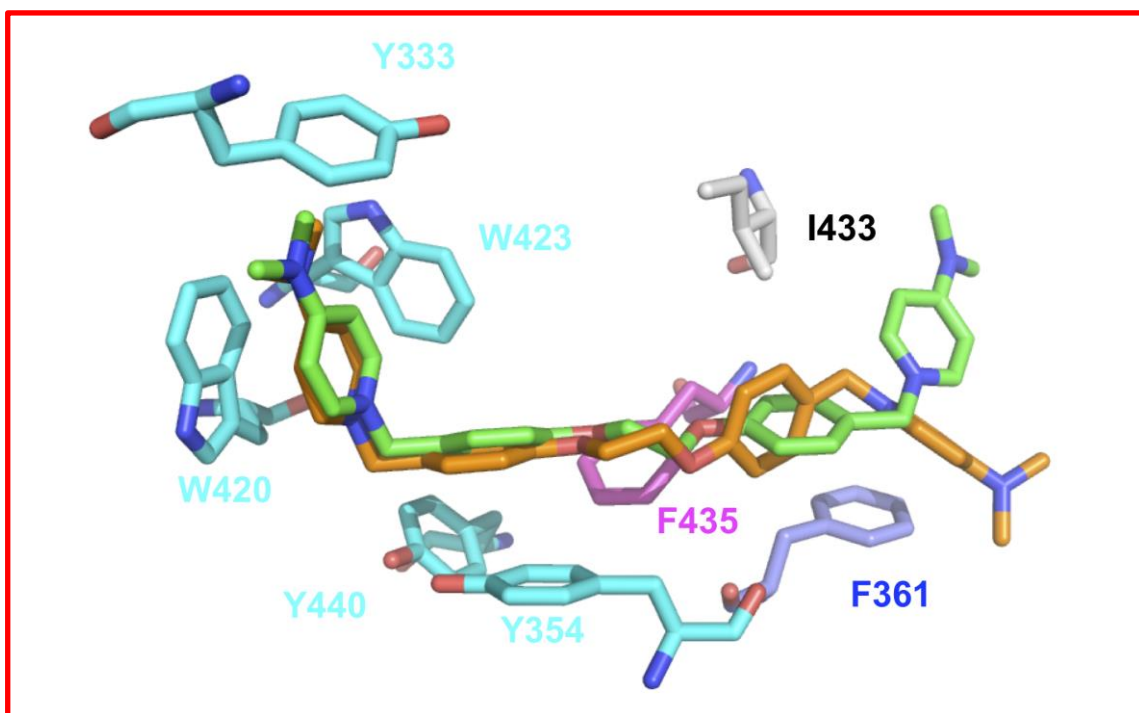

**Figure S6.** Superposition of the resulting pose of compound **10a** (carbon atoms in green color) with compound **10a** (carbon atoms in orange color) inserted into Cho binding site into the crystal structure (PDB ID: 4TST)



**Table S2.** Data collection and refinement statistics. Values in parentheses refer to the highest resolution shell. Ramachandran plot statistics were determined with PROCHECK.

|                                                     | <b>ChoK<math>\alpha</math>1-10a</b>                       |
|-----------------------------------------------------|-----------------------------------------------------------|
| Space group                                         | P4 <sub>3</sub> 2 <sub>1</sub> 2                          |
| Wavelength (Å)                                      | 1.0507                                                    |
| Resolution (Å)                                      | 58-1.45<br>(1.53-1.45)                                    |
| Cell dimensions (Å)                                 | <i>a</i> = 60.65<br><i>b</i> = 60.65<br><i>c</i> = 220.40 |
| Unique reflections                                  | 74.167                                                    |
| Completeness                                        | 99.9 (99.4)                                               |
| <i>R</i> <sub>sym</sub>                             | 0.058 (0.672)                                             |
| <i>I</i> / <i>s</i> ( <i>I</i> )                    | 34.8 (5.0)                                                |
| Redundancy                                          | 23.2 (14.0)                                               |
| <i>R</i> <sub>work</sub> / <i>R</i> <sub>free</sub> | 0.197/0.218                                               |
| RMSD from ideal geometry, bonds (Å)                 | 0.0048                                                    |
| RMSD from ideal geometry, angles (°)                | 1.079                                                     |
| < <i>B</i> > protein (Å <sup>2</sup> )              | 18.11                                                     |
| < <i>B</i> > EB3D (Å <sup>2</sup> )                 | 30.50                                                     |
| < <i>B</i> > solvent (Å <sup>2</sup> )              | 33.42                                                     |
| < <i>B</i> > Ethylenglycol (Å <sup>2</sup> )        | 29.97                                                     |
| Ramachandran plot:                                  |                                                           |
| Most favored (%)                                    | 97.61                                                     |
| Additionally allowed (%)                            | 1.882.09                                                  |
| Generously allowed (%)                              | 0.000.30                                                  |
| PDB ID                                              | 4TST                                                      |

## Experimental Procedures

### General Experimental details

**Chemistry.** Melting points were taken in open capillaries on a Stuart Scientific SMP3 electrothermal melting-point apparatus and were uncorrected. Elemental analyses were performed on the Thermo Scientific Flash 2000 analyzer only on the final compounds tested as *HsChoK $\alpha$ 1* inhibitors. The measured values for C, H, and N agreed to within  $\pm 0.40\%$  of the theoretical values. Analytical thin-layer chromatography (TLC) was performed using Merck Kieselgel 60 F254 aluminum plates and visualized by UV light or iodine. All evaporation occurred *in vacuo* with a Büchi rotary evaporator and the pressure controlled by a Vacuubrand CVCII apparatus. For flash chromatography, Merck silicagel 60 with a particle size of 0.040 – 0.063 mm (230 – 400 mesh ASTM) was used: 600 MHz  $^1\text{H}$  and 151 MHz  $^{13}\text{C}$  NMR Varian Direct Drive; a 400 MHz  $^1\text{H}$  and 100 MHz  $^{13}\text{C}$  NMR Varian Direct Drive; or 300 MHz  $^1\text{H}$  and 75 MHz  $^{13}\text{C}$  NMR Varian Inova Unity spectrometers at room temperature. Chemical shifts ( $\delta$ ) are quoted in parts per million (ppm) and are referenced to the residual solvent peak. Spin multiplicities are given as s (singlet), bs (broad singlet), d (doublet), t (triplet), and m (multiplet). High-resolution Nano-Assisted Laser Desorption/Ionization (NALDI-TOF) or Electrospray Ionization (ESI-TOF) mass spectra were carried out on a Bruker Autoflex or a Waters LCT Premier Mass.

### General procedure A for the synthesis of the linker

**1,2-bis(*p*-tolxy)ethane (7)** [1]: To a solution of 0.4 g of NaOH in 5 mL of EtOH 1 g of 4-methoxyphenol (**6**) was added. The mixture was stirred for 30 min at room temperature and afterwards 0.4 mL of 1,2-dibromoethane was added before microwave irradiation at 140 °C for 28 min. The reaction was quenched by cooling (ice/water bath) and by addition of 25 mL distilled water. The solid was filtered

and washed twice with water H<sub>2</sub>O (2 x 2 mL) and EtOH (1 x 2 mL), dried to vacuum to furnished a white solid identified as 1,2-bis(*p*-methylphenoxy)ethane (**7**). Yield 35%.

<sup>1</sup>H NMR (300 MHz, CDCl<sub>3</sub>) δ: 7.10-7.08 (d, *J* = 8.61 Hz, 4H), 6.86-6.84 (d, *J* = 8.44 Hz, 4H), 4.28 (s, 4H), 2.29 (s, 6H).

**1,2-bis(4-(bromomethyl)phenoxy)ethane (8)** [2]: To a solution of **7** (0.1, 25 mmol) in tetrachloromethane (3 mL), a mixture of dibenzoylperoxide (0.5 mg, 2 mmol) and NBS (9.08 mg, 51 mmol) was added. The mixture was purged with argon before microwave irradiation at 120 °C, 21 min. The precipitate was filtered and washed twice with diethylether (2 x 2 mL), and dried under vacuum to give **7** as a yellow solid. Yield: 65%,

<sup>1</sup>H NMR (300 MHz, CDCl<sub>3</sub>) δ: 7.35-7.32 (d, *J* = 8.73 Hz, 4H), 6.92-6.88 (d, *J* = 8.73 Hz, 4H), 4.50 (s, 4H), 4.32 (s, 4H).

### General procedure B for the synthesis of the cationic heads

The cationic heads (**9a-d**) are commercially available while that the cationic heads (**9f-l**) were obtained following the procedure previously described [3-9], starting of 4-chloroquinoline and 7,4-dichloroquinoline which were treated with *N*-methylaniline, 4-chloro-*N*-methylaniline, perhydroazepine or pyrrolidine to obtain **9e** (4-*N*-methylanilinoquinoline), **9f** (4-(4-chloro-*N*-methylanilino)quinoline), **9g** (7-chloro-4-(*N*-methylanilino)quinoline), **9h** (7-chloro-4-(4-chloro-*N*-methylanilino)quinoline), **9i** (4-perhydroazepinoquinoline), **9j** (7-chloro-4-perhydroazepinoquinoline) and/or **9k** (7-chloro-4-(pyrrolidino)quinoline).

## References

1. Cantrill, S.J. *et al.* The influence of macrocyclic polyether constitution upon ammonium ion/crown ether recognition processes *Chem. Eur. J.* **6**, 2274-2287 (2000).
2. Xiao, J. *et al.* Binuclear titanocenes linked by the bridge combination of rigid and flexible segment: Synthesis and their use as catalysts for ethylene polymerization. *Journal of Molecular Catalysis A: Chemical.* **267**, 86-91 (2007).
3. Gómez-Pérez, V. *et al.* Bis-pyridinium and Bis-quinolinium Derivatives as Choline Kinase Inhibitors with Antiproliferative Activity against the Human Breast Cancer SKBR-3 Cell Line. *Chem. Med. Chem.* **7**, 663 – 669 (2012).
4. Campos, J. *et al.* QSAR of 1,1'-(1,2-Ethylenebisbenzyl)bis(4-substitutedpyridinium) dibromides as choline kinase Inhibitors: A different approach for antiproliferative drug design. *Bioorg. & Med. Chem. Lett.* **10**, 767-770 (2000).
5. Campos, J. M. *et al.* Quantitative Structure Activity Relationships for a Series of Symmetrical Bisquaternary Anticancer compounds. *Bioorg. & Med. Chem.* **10**, 2215-2231 (2002).
6. Sánchez-Martín, R.M. *et al.* Symmetrical bis-quinolinium compounds: New human choline kinase inhibitors with antiproliferative activity against the HT-29 cell line. *J. Med. Chem.* **48**, 3354-3363. (2005).
7. Conejo-García, A. *et al.* Choline kinase inhibitory effect and antiproliferative activity of new 1,1',1''-(benzene-1,3,5-triylmethylene)tris{4-[disubstituted)amino]pyridinium} tribromides. *Eur. J. Med. Chem.* **38**, 109-116 (2002).
8. Conejo-García, A. *et al.* Bispyridinium cyclophanes: novel templates for human choline kinase inhibitors. *J. Med. Chem.* **46**, 3754-3757 (2003).
9. Castro-Navas, F.F. *et al.* New more polar symmetrical bipyridinic compounds: new strategy for the inhibition of choline kinase  $\alpha 1$ . *Future in Medicinal Chemistry.* **7**, 417-436. (2015)
